# Supplementary material for: Mercury determination in bioresorbable calcium phosphate using a new electrothermal vaporization system coupled to ICP-MS
Source: Royal Society of Chemistry journal article supplement (doi:10.1039/d2ja00414c), 2023-01-01
Supplement: d2ja00414c1.pdf [file d2ja00414c1.pdf]

## **Electronic Supplementary Information (ESI)**

### **Mercury Determination in Bioresorbable Calcium Phosphate Using a New Electrothermal Vaporization System Coupled to ICP-MS**

**Jussiane S. Silva<sup>\*</sup>, Graciela M. Heidrich, Bruno O. Poletto, Jose N. G. Paniz, Valderi L.**

**Dressler, Erico M. M. Flores**

*Departamento de Química, Universidade Federal de Santa Maria, 97105-900, Santa Maria,  
RS, Brazil*

\*Corresponding author: Tel/Fax: +55 55 3220 8802

E-mail address (Jussiane S. Silva): [jussiane.silva@ufsm.br](mailto:jussiane.silva@ufsm.br)

**Table S-1.** Operating parameters for Hg determination in bioresorbable calcium phosphate-based materials using the ICP-MS equipment in standard mode (pneumatic nebulization) or the ETV system coupled to ICP-MS equipment.

| <b>Parameter</b>                                | <b>ETV-ICP-MS</b> | <b>NEB-ICP-MS</b> |
|-------------------------------------------------|-------------------|-------------------|
| RF power, W                                     | 1300              | 1300              |
| Plasma gas flow rate, L min <sup>-1</sup>       | 15.0              | 15.0              |
| Auxiliary gas flow rate, L min <sup>-1</sup>    | 2.0               | 2.0               |
| Nebulizer/carrier gas flow, L min <sup>-1</sup> | 1.10              | 1.14              |
| Dwell time, ms                                  | 20                | 20                |
| Sweeps per reading                              | 1                 | 5                 |
| Readings per replicate                          | 1300              | 5                 |
| Replicates                                      | 1                 | 3                 |
| Isotopes, m/z                                   | <sup>202</sup> Hg |                   |

**Table S-2.** Heating program used for the determination of Hg in bioresorbable calcium phosphate-based materials by ETV-ICP-MS.

| <b>Step</b>  | <b>Temperature, °C</b> | <b>Ramp time, s</b> | <b>Hold time, s</b> |
|--------------|------------------------|---------------------|---------------------|
| Drying*      | 80                     | 0                   | 30                  |
| Pyrolysis    | 300                    | 1                   | 20                  |
| Vaporization | 650                    | 1                   | 10                  |
| Cooling      | 100                    | 0                   | 120                 |

\* This step was performed without the closed glass chamber and when an aqueous solution was used for calibration.

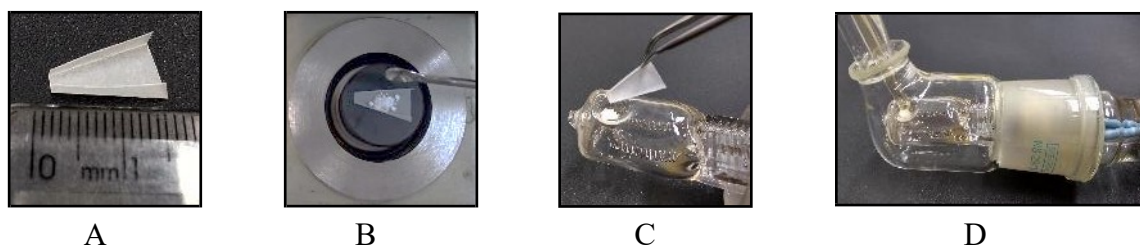

**Figure S-1.** Schematic representation of the bioresorbable calcium phosphate-based materials analysis procedure using the ETV system. (A) Piece of paper used for weighing and transferring the sample to the ETV system; (B) Sample weighing; (C) Sample transfer to the lamp holder; and (D) Insertion of the lamp with the sample in the vaporization chamber.

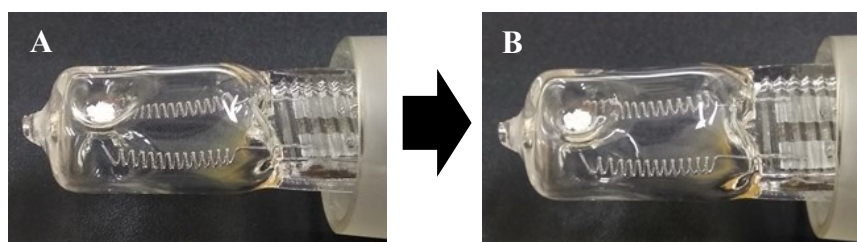

**Figure S-2.** and (B) after  
Conditions: 3  
(hold time of 10  
1.

Lamp containing Sample-1 (A) before  
been submitted to the heating program.  
mg of Sample-1, vaporization at 650 °C  
s) and carrier gas flow rate of 1.09 L min<sup>-1</sup>

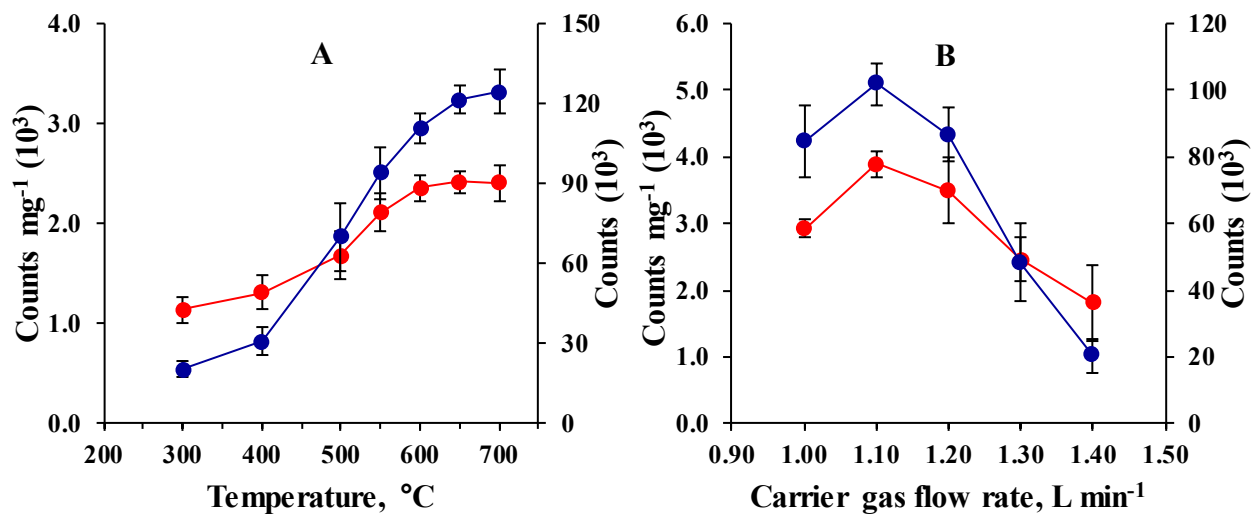

**Figure S-3.** (A) Vaporization curves of Hg by ETV-ICP-MS. Conditions: vaporization step (hold time of 10 s) and carrier gas flow of 1.10 L min<sup>-1</sup>. (B) Effect of carrier gas flow rate on Hg signal intensity. Conditions: vaporization at 650 °C (hold time of 10 s). (●) Signal intensity normalized to 1.0 mg (3 to 4 mg of Sample-1) corresponding to the vertical axis on the left side. (●) Signal intensity for 250 pg of Hg from 2 μL of aqueous reference solution corresponding to the vertical axis on the right side.

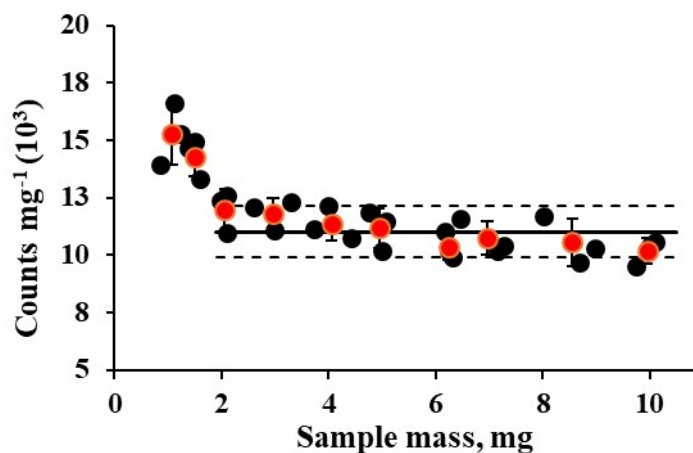

**Figure S-4.** Effect of sample mass on Hg signal intensity by ETV-ICP-MS. (●) Individual result of Hg intensity for each sample mass. (●) Results of the mean Hg intensity for each sample mass range. (—) The result of the mean Hg intensity was obtained from the suitable mass range for the analysis. Conditions: Sample-1, vaporization at 650 °C (hold time of 10 s) and carrier gas flow rate of 1.10 L min<sup>-1</sup>.

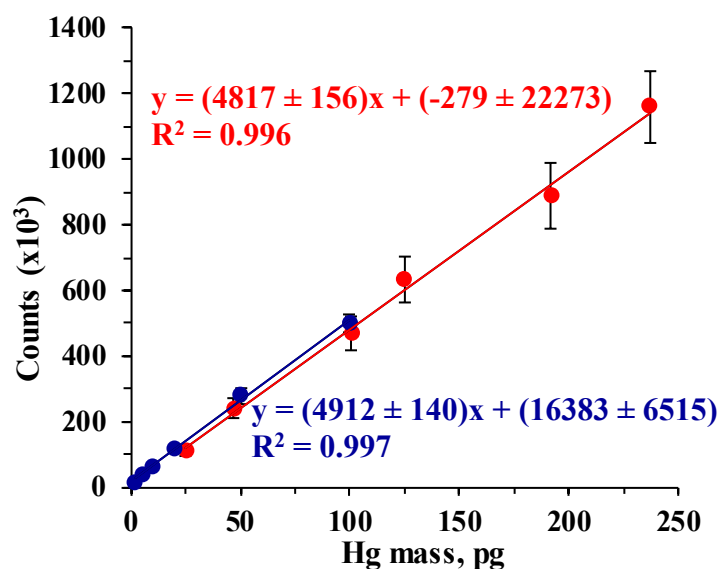

**Figure S-5.** Calibration strategies from (●) CRM MESS-3 and (●) aqueous reference solution added to the sample residue for Hg determination in bioresorbable calcium phosphate-based materials by ETV-ICP-MS. Regression equation:  $y = (\text{slope} \pm \text{standard error})x + (\text{intercept} \pm$

standard error). Conditions: vaporization at 650 °C (hold time of 10 s) and carrier gas flow rate of 1.10 L min<sup>-1</sup>.
